# Supplementary material for: Heme ameliorates dextran sodium sulfate-induced colitis through providing intestinal macrophages with noninflammatory profiles
Source: PubMed Central journal article supplement — Proc Natl Acad Sci U S A. 2018 Jul 30;115(33):8418–23. doi: 10.1073/pnas.1808426115 (PMC6099887; doi:10.1073/pnas.1808426115), 2018-07-30
Supplement: pnas.1808426115.sapp.pdf [file pnas.1808426115.sapp.pdf]

**Heme ameliorates dextran sodium sulfate-induced colitis through providing  
intestinal macrophages with non-inflammatory profiles**

Hisako Kayama<sup>1,2,3#</sup>, Masako Kohyama<sup>4,5#</sup>, Daisuke Okuzaki<sup>6</sup>, Daisuke Motooka<sup>6</sup>,  
Soumik Barman<sup>1,2,3</sup>, Ryu Okumura<sup>1,2,3</sup>, Masato Muneta<sup>1</sup>, Katsuaki Hoshino<sup>11</sup>, Izumi  
Sasaki<sup>8</sup>, Wataru Ise<sup>12</sup>, Hiroshi Matsuno<sup>10</sup>, Junichi Nishimura<sup>10</sup>, Tomohiro Kurosaki<sup>12</sup>,  
Shota Nakamura<sup>6</sup>, Hisashi Arase<sup>4,5</sup>, Tsuneyasu Kaisho<sup>7,8,9\*</sup>, and Kiyoshi Takeda<sup>1,2,3</sup>

Corresponding author: Kiyoshi Takeda

Laboratory of Immune Regulation, Department of Microbiology and Immunology,

Graduate School of Medicine, Osaka University,

2-2 Yamadaoka, Suita, Osaka 565-0871, Japan

Tel: +81-6-6879-3980, Fax: +81-6-6879-3989

E-mail: ktakeda@ongene.med.osaka-u.ac.jp

and Tsuneyasu Kaisho

Department of Immunology, Institute of Advanced Medicine, Wakayama Medical

University,

811-1 Kimiidera, Wakayama, Wakayama 641-8509

Tel: +81-73-441-0606, Fax: +81-73-445-5585

E-mail: tkaisho@wakayama-med.ac.jp

and Hisako Kayama

Laboratory of Immune Regulation, Department of Microbiology and Immunology,

Graduate School of Medicine, Osaka University,

2-2 Yamadaoka, Suita, Osaka 565-0871, Japan

Tel: +81-6-6879-3982, Fax: +81-6-6879-3989

E-mail: [kayama@ongene.med.osaka-u.ac.jp](mailto:kayama@ongene.med.osaka-u.ac.jp)

**This PDF file includes:**

Supplementary text

Figs. S1 to S6

Tables S1 to S2

## SI Materials and Methods

### Generation of floxed-*Spic* mice

To generate the *Spic*-targeted mice, a targeting vector was designed to delete exon 6 encoding the Ets domain of Spi-C. To construct the targeting vector, C57BL/6N mouse genomic DNA fragments were amplified by PCR using KOD -plus- DNA polymerase (Toyobo, Osaka, Japan). A 6.8 kbp long arm containing exons 2-6, which has insertion of a loxP site in the intron between exon 5 and 6, was connected to a phosphoglycerate kinase promoter-driven neomycin resistance cassette (neo) flanked by two FRT sites and a loxP site. Then, a 2.0 kbp short arm was ligated to downstream of the neo cassette. A herpes simplex virus thymidine kinase gene (HSV-TK) was attached at the upstream end of the long arm. The targeting vector was linearized with *SalI* and electroporated into a C57BL/6N-derived embryonic stem cell line, JM8A3.N1. The clones with resistance to G418 and gancyclovir were screened for homologous recombination by PCR and confirmed by Southern blot analysis with the probe shown in Fig. S2A. ES clone no. 58 shown in Fig. S2A was used to generate chimeric and the *Spic*-targeted mice. To delete the neo cassette flanked by two FRT sites, the *Spic*-targeted mice were intercrossed with C57BL/6-Tg(CAG-FLPe) 36Ito/ItoRbrc mice (RBRC01834) (RIKEN BioResource Center, Japan)(1).

### Generation of *Lyz2-cre*; *Spic*<sup>lox/lox</sup> mice

*Lyz2-cre* transgenic mice (The Jackson Laboratory) were bred with *Spic*<sup>lox/+</sup> mice to generate mice carrying *Lyz2-cre* and heterozygous *Spic* flox (*Lyz2-cre*; *Spic*<sup>lox/+</sup>) genes. These mice were mated with *Spic*<sup>lox/flox</sup> mice. Offspring carrying *Lyz2-cre* and floxed *Spic* genes (*Lyz2-cre*; *Spic*<sup>lox/flox</sup>) and floxed *Spic* genes (*Spic*<sup>lox/flox</sup>) were used for further experiments. The floxed *Spic* mice were backcrossed to C57BL/6J mice for at least six generations.

## **Reagents**

The Ca<sup>2+</sup> ionophore A23187, phorbol myristate acetate (PMA), lipopolysaccharide (O55: B5), and an anti- $\beta$ -actin antibody (clone AC-74) were purchased from Sigma-Aldrich (St. Louis, MO, USA). Dextran sulfate sodium salt (DSS) was purchased from MP Biomedicals (Kaysersberg, France). Anti-GFP (clone B-2), anti-HA (clone F-7), and anti-p65 (C-20) antibodies were purchased from Santa Cruz Biotechnology (Dallas, TX, USA). An anti-His antibody (clone 291-3) was purchased from MBL Co., Ltd. (Nagoya, Aichi, Japan). An anti-IRF5 antibody (ab21689) and iron stain (ab150674) were purchased from Abcam (Cambridge, UK). Hemoglobin Colorimetric Assay Kit was purchased from Cayman Chemical Company (Ann Arbor, MI, USA). Iron Assay Kit was purchased from Metallogenics Co., Ltd. (Chiba, Chiba, Japan). The AIN93G and iron-reduced diets were manufactured by Oriental Yeast (Tokyo, Japan).

## **Preparation of M $\phi$ s**

To generate BMDM $\phi$ s, bone marrow cells were prepared from mouse femurs and tibias, passed through a nylon mesh, and cultured in RPMI 1640 culture medium (10% fetal bovine serum, 100  $\mu$ g/ml streptomycin, 100 U/ml penicillin, and 100  $\mu$ M 2-mercaptoethanol) with 50 ng/ml M-CSF (R&D Systems, Minneapolis, MN, USA). After 14 days, the adherent cells were used as M-CSF-induced BMDM $\phi$ s. To induce PB-MOM $\phi$ s, CD11b<sup>+</sup> Ly-6C<sup>high</sup> monocytes from blood were cultured in RPMI 1640 culture medium containing 50 ng/ml M-CSF for 14 days. BMDM $\phi$ s and PB-MOM $\phi$ s were pretreated with 40  $\mu$ M hemin for 18 h and stimulated with LPS for 24 h. The culture supernatants were used for the analysis of proinflammatory cytokine production.

## **Flow cytometry**

The following antibodies were purchased from BD Biosciences: anti-mouse CD16/32 (clone 2.4.G2), PE-Cy7-conjugated anti-mouse-Ly-6C (clone AL-21), and APC-

conjugated anti-mouse-CD11c (clone HL3). PE-conjugated anti-mouse CX<sub>3</sub>CR1 (clone SA011F11), APC-conjugated anti-mouse F4/80 (clone BM8), Pacific blue-conjugated anti-mouse CD11b (clone M1/70), Percp-Cy5.5-conjugated anti-mouse CD4 (clone CK1.5), APC-conjugated anti-mouse IL-17A (clone TC11-18H10.1), FITC-conjugated anti-mouse IFN- $\gamma$  (clone XMG1.2), PE-conjugated anti-mouse IL-10 (clone JES5-16E3), and FITC- or PE/Cy7-conjugated anti-mouse CD45 (clone 30-F11) antibodies were purchased from BioLegend. APC-conjugated anti-mouse Foxp3 antibody (clone 3G3) was purchased from TONBO Biosciences (Tucson, AZ, USA). For dead cell exclusion, 7-AAD (BD Biosciences) and Fixable Viability Stain 510 (BD Biosciences) were used. Flow cytometric analysis was performed with a FACSCanto II flow cytometer (BD Biosciences) with FlowJo software (Tree Star, Ashland, OR, USA). Murine splenic CD11b<sup>-</sup> F4/80<sup>+</sup> RPM $\phi$ s, murine blood CD11b<sup>+</sup> Ly-6C<sup>high</sup> monocytes, and murine large intestinal innate myeloid cell subsets were isolated with a FACS Aria flow cytometer (BD Biosciences). The instrumental compensation was set in each experiment using two-color, three-color, four-color, and six-color stained samples.

### **Quantitative RT-PCR**

Total RNA was isolated using the RNeasy Mini Kit (Qiagen, Manchester, UK), and the RNA was reverse transcribed with Moloney Murine Leukemia Virus Reverse Transcriptase (M-MLV) (Promega, Madison, WI, USA) and random primers (Toyobo, Tokyo, Japan) after treatment with RQ1 DNase I (Promega). Quantitative RT-PCR was performed on a Step One Plus<sup>TM</sup> Real-Time PCR System (Applied Biosystems) using GoTaq qPCR Master Mix (Promega). All values were normalized to the expression of *Gapdh*, encoding glyceraldehyde-3-phosphate dehydrogenase, and the fold difference in expression relative to that of *Gapdh* is shown. The amplification conditions were 50 °C (2 min), 95 °C (10 min), and 40 cycles of 95 °C (15 s) and 60 °C (60 s). The following

primer sets were used: *Gapdh*, 5'-CCTCGTCCCGTAGACAAAATG-3' and 5'-TCTCCACTTTGCCACTGCAA-3'; *Il6*, 5'-CTGCAAGAGACTTCCATCCAGTT-3' and 5'-AAGTAGGGAAGGCCGTGGTT-3'; *Tnf*, 5'-TCCAGGCGGTGCCTATGT-3' and 5'-CACCCCGAAGTTCAGTAGACAGA-3'; *Il1a*, 5'-CAGTCCATAACCCATGATCT-3' and 5'-ATCATTCATGACAACTTCT-3'; *Spic*, 5'-TGCCTCTGGCTTTGTCAACC-3' and 5'-TCTTCCAGCAAAGGGAGGA-3'; *Hmox1*, 5'-CTGCTAGCCTGGTGCAAGATACT-3' and 5'-GTCTGGGATGAGCTAGTGCTGAT-3'; *Slc40a1*, 5'-CCCTGCTCTGGCTGTAAAAG-3' and 5'-TCTTTCTCACCCATTAGATG-3'; *Blvrd*, 5'-TCGAGGGCCCTCGTCCATCC-3' and 5'-GGATGCATAAGATTCTGCAA-3'; and *Lyz2*, 5'-CCTGTGGGATCAATTGCAGT-3' and 5'-CCATGCCACCCATGCTCGAA-3'.

### **Isolation of murine intestinal lamina propria cells**

Murine innate myeloid cells and CD4<sup>+</sup> lymphocytes were isolated from large intestinal lamina propria using a previously described protocol (2).

### **Induction of DSS-induced colitis**

Eight-to twelve-week-old *Spic* mutant mice and their littermate control mice were administered with 1.5% DSS (36–50 kDa) in the drinking water for 7 days to induce acute colitis. Mice were analyzed for changes in weight and large intestinal histology. Large intestines collected from mice after the initiation of 1.5% DSS administration were fixed in 4% paraformaldehyde. Paraffin-embedded sections mounted on glass slides were used for Hematoxylin-Eosin (H&E) staining and images of H&E staining were taken using Biozero (KEYENCE, Osaka, Japan). Each section of the large intestine was evaluated using inflammation scores, as described previously(3). In mice administered with DSS, the severity of colitis were evaluated as previously reported(4). To analyze the

production of cytokines by whole colons, the colons were opened longitudinally and washed in PBS supplemented with penicillin and streptomycin to remove feces. The colons were treated with HBSS containing 5 mM EDTA for 20 min at 37°C on a shaker and rubbed against a paper towel to remove the epithelial cells. The tissues were cut into small pieces and cultured in 24-well flat-bottom culture plates in serum-free RPMI 1640 medium supplemented with penicillin and streptomycin. After 24 h, the culture supernatants were collected and used for the analysis of cytokine production.

### **Determination of microbiota by deep sequencing**

Extraction of bacteria DNA from feces was performed according to the protocol described in previous report(5). Libraries were prepared according to “Illumina 16S Metagenomic Sequencing Library Preparation Guide” with a primer set (27Fmod: 5'-AGRGTTTGATCMTGGCTCAG-3' and 338R: 5'-TGCTGCCTCCCGTAGGAGT-3') targeting the V1–V2 region of the 16S rRNA gene. 251 bp paired end sequencing of the amplicon was performed on a MiSeq (Illumina) using MiSeq v2 500 cycle kit. Raw sequences were demultiplexed and quality-trimmed with the FASTX-Toolkit ([hannonlab.cshl.edu/fastx\\_toolkit/index.html](http://hannonlab.cshl.edu/fastx_toolkit/index.html)) and BBtrim ([bbmap.sourceforge.net](http://bbmap.sourceforge.net)). 30,000 reads per sample were randomly selected using seqtk (<https://github.com/lh3/seqtk>) for further analysis. The processed sequences were clustered into OTUs defined at a 97% similarity cutoff using UCLUST version 1.2.22q. Representative sequences for each OTU were then classified taxonomically by using RDP Classifier version 2.2, with the Greengenes 13\_8 database. The bioinformatics pipeline QIIME, version 1.9.1, was used as the informatics environment for all relevant processing of raw sequencing data and calculation of bacterial relative abundances.

### **Intracellular cytokine staining**



Spleen, MLN, and large intestinal CD4<sup>+</sup> T cell intracellular IFN- $\gamma$ , IL-10, and IL-17A expression was analyzed with a Cytofix/Cytoperm Plus Kit with GolgiStop (BD Biosciences), according to the manufacturer's instructions. In brief, CD4<sup>+</sup> T cells isolated from the large intestinal lamina propria of mice were incubated with 50 ng/ml PMA, 5  $\mu$ M calcium ionophore A23187, and GolgiStop in complete RPMI 1640 at 37 °C for 4 h. Surface staining was performed with anti-CD4 antibody for 20 min at 4 °C and intracellular cytokine staining was performed with the indicated antibodies for 20 min.

### **Generation of RAW264.7 cells stably expressing Spi-C**

RAW264.7 cells were co-transfected with linearized empty pcDNA3.1 (+) vector (Invitrogen) and linearized pCAGGS vector (Addgene) inserted into the sequence for Spi-C-His using nucleofection (Nucleofector Kit for Mouse Macrophages; Lonza). These cells were cultured in G418-containing complete RPMI 1640. Clones resistant to G418 were selected and screened for the expression of Spi-C-His by western blot using anti-His antibody and quantitative RT-PCR.

### **DNA microarray analysis**

CD11c<sup>high</sup> CD11b<sup>-</sup> DCs, CD11c<sup>-</sup> CD11b<sup>+</sup> cells, CX3CR1<sup>high</sup> M $\phi$ s, and CD11c<sup>+</sup> CD11b<sup>+</sup> CX3CR1<sup>-</sup> cells were collected from the large intestinal lamina propria of C57BL/6J mice. Total RNA was extracted with an RNeasy kit (Qiagen). RNA quality was assessed using an Agilent Bioanalyzer 2100 and only RNA with minimal degradation and distinct 18S and 28S rRNA bands were used for DNA microarray analysis. Fragmented and biotin-labeled cDNA was synthesized from 100 ng purified mRNA with the GeneChip 3'IVT Express Kit Assay (Affymetrix). The cDNA was hybridized to Mouse Genome 430A 2.0 Array (Affymetrix). Hybridized chips were stained, washed, and scanned with GeneChip Scanner 3000 (Affymetrix) according to manufacturer instructions. The CEL files were performed a MAS5.0 normalization using Genespring software version 14.8 (Agilent

Technologies). The differentially expressed probes with 2-fold changes up $>2.0$  (CX3CR1<sup>high</sup> M $\phi$ s cells vs. others) were calculated using Subio Basic Plug-in (Subio) followed by extracting lists of probe set IDs that were flagged Present in all samples. A total of 239 probe sets were used for further analysis. These results have been deposited in the National Center Biotechnology Information (NCBI) Gene Expression Omnibus database (GSE100804).

### **RNA-seq analysis**

Control and *Spic*<sup>-/-</sup> BMDM $\phi$ s pretreated with 40  $\mu$ M hemin for 18 h were stimulated with (designated 'CNT\_4' and 'cKO\_4', respectively) or without (designated 'CNT\_0' and 'cKO\_0', respectively) 100 ng/ml LPS for 4 h. Total RNAs were extracted from these cells using a RNeasy Mini Kit (Qiagen). Library preparation was performed using a TruSeq stranded mRNA sample prep kit (Illumina, San Diego, CA) according to the manufacturer's instructions. Sequencing was performed on an Illumina HiSeq 2500 platform in the 75-base single-end mode. Illumina Casava1.8.2 software was used for base calling. Sequenced reads were mapped to the mouse reference genome sequences (mm10) using TopHat v2.0.13 in combination with Bowtie2 ver. 2.2.3 and SAMtools ver. 0.1.19. The fragments per kilobase of exon per million mapped fragments (FPKMs) were calculated using Cuffnorm version 2.2.1. Among the calculated genes with a normalized FPKM value  $\geq 0.1$  in CNT\_4, 85 genes were up-regulated  $\geq 3.0$ -fold from cKO\_0 to cKO\_4 and  $\geq 1.74$ -fold from CNT\_4 to cKO\_4 (Table S2). These results have been deposited in the National Center Biotechnology Information (NCBI) Gene Expression Omnibus database (GSE100805).

### **Cytokine analysis**

The concentrations of IL-6, TNF- $\alpha$ , IL-1 $\alpha$ , IL-10, IL-17A, and IFN- $\gamma$  in culture

supernatants or blood serum were measured with a Cytometric Bead Array (CBA) kit (BD Biosciences).

**Primer sets for ChIP assay**

The primer sequences were: *Il6*; 5'-ACCCTCACCTCCAACAA-3' and 5'-GTCCTATATTTATTGGGGGT-3', *Tnf*; 5'-CACCAAGGAAGTTTTCCGAG-3' and 5'-CTTGCTGTCCTCGCTGAGGG-3', and *Il1a*; 5'-TCCTCAAGCAGGTAGGAGTG-3' and 5'-GGCCGGTATCAGGCAGAATG-3'.

**Figure S1**

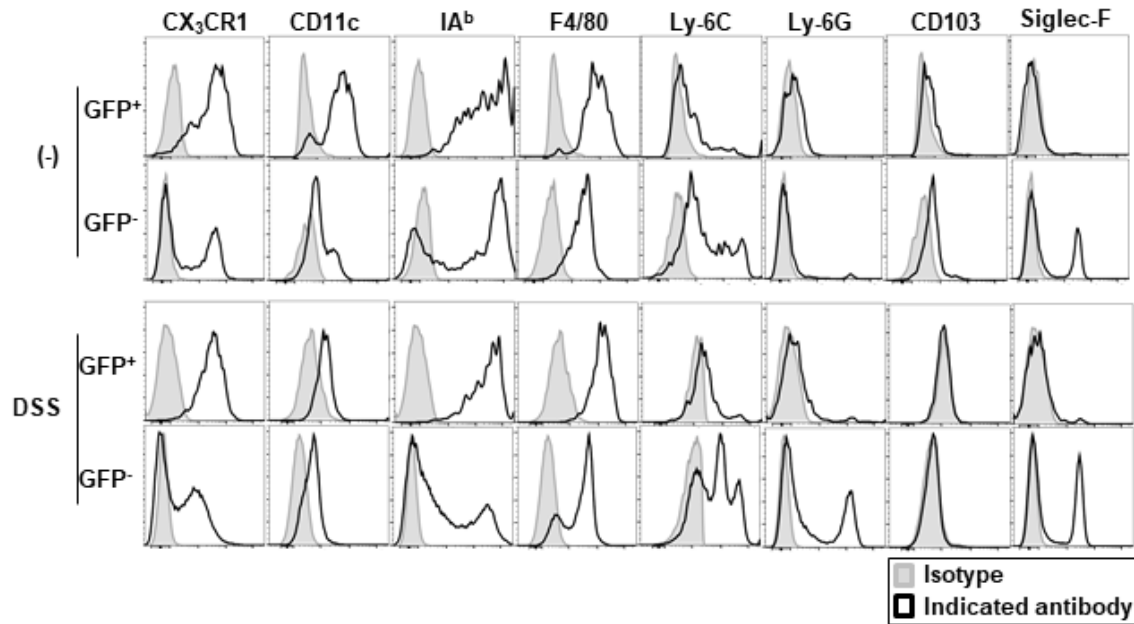

**Fig. S1: Expression of Spi-C in murine innate myeloid cells from the colon.**

Large intestinal lamina propria cells were isolated from *Spic*<sup>IRE5-GFP/GFP</sup> mice administered with or without 1.5% DSS for 5 days. Surface expression of CX<sub>3</sub>CR1, CD11c, IA<sup>b</sup>, F4/80, Ly-6C, Ly-6G, CD103, and Siglec-F on Spi-C-positive CD11b<sup>+</sup> (GFP<sup>+</sup>) and Spi-C-negative CD11b<sup>+</sup> (GFP<sup>-</sup>) cells among CD45<sup>+</sup> living cells. Filled histograms, isotype control. All data are representative of two independent experiments.

**Figure S2**

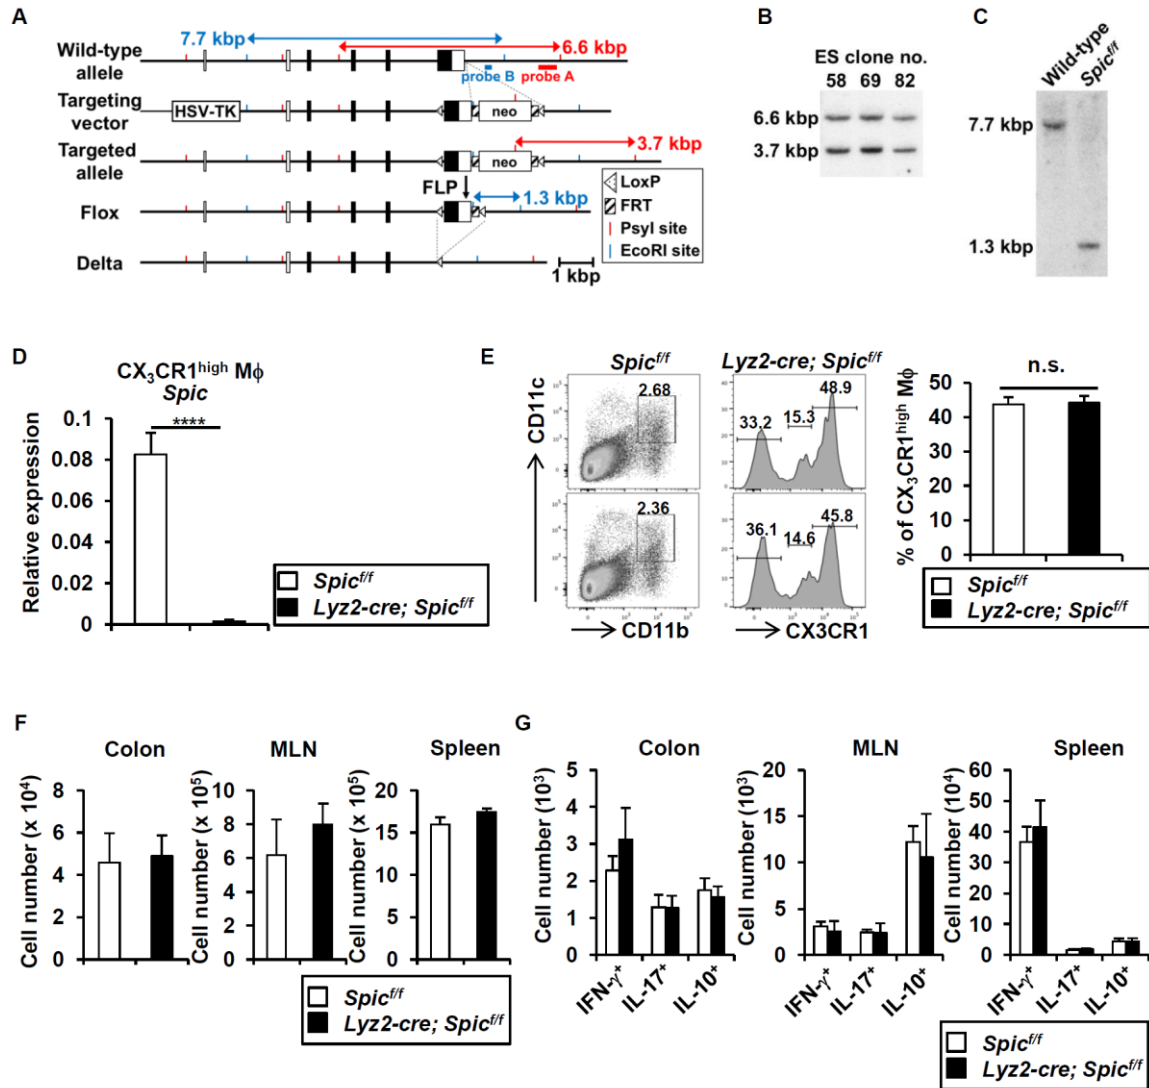

**Fig. S2: Lack of *Spic* expression in intestinal  $CX_3CR1^{high}$  Mφ of in *Lyz2-cre; Spic<sup>flox/flox</sup>* mice.** (A) Map of the Spi-C wild-type genome, targeting vector, and predicted targeted gene. Open boxes, noncoding exons; closed boxes, coding exons. (B) Southern blot analysis of ES clones. Genomic DNA from ES cells was digested with *PsyI*, separated electrophoretically, and then hybridized with the probe A (indicated by red) as shown in A. Approximate sizes of the wild-type and targeted bands are 6.6 and 3.7 kbp, respectively. (C) Southern blot analysis of wild-type or homozygous floxed mice. Genomic DNA from mice was digested with *EcoRI*, electrophoresed, and hybridized with the probe B (indicated by blue) as shown in A. Approximate sizes of the wild-type and floxed bands are 7.7 and 1.3 kbp, respectively. (D) Expression of *Spic* in large intestinal  $CX_3CR1^{high}$  Mφ from control and *Spic* mutant mice (means values  $\pm$  SEM from four independent experiments).  $p < 0.001$ . (E) Flow cytometric blots of the cells isolated from the colons of control and *Spic* mutant mice (left). Histograms show the expression of  $CX_3CR1$  on large intestinal  $CD11b^+ CD11c^+$  cells (middle). Frequencies of  $CX_3CR1^{high}$  Mφs in large intestinal  $CD11b^+ CD11c^+$  cells (right). n.s., not significant. Mean values  $\pm$  SEM from four independent experiments. (F, G) The numbers of Foxp3<sup>+</sup> CD4<sup>+</sup> T cells (F), IFN-γ<sup>+</sup>, IL-17<sup>+</sup>, and IL-10<sup>+</sup>-producing CD4<sup>+</sup> T cells (G) in the indicated tissues from control and *Spic* mutant mice in the steady state (mean values  $\pm$  SEM). All data are generated from 2 independent experiments. n = 6 in each group.

Figure S3

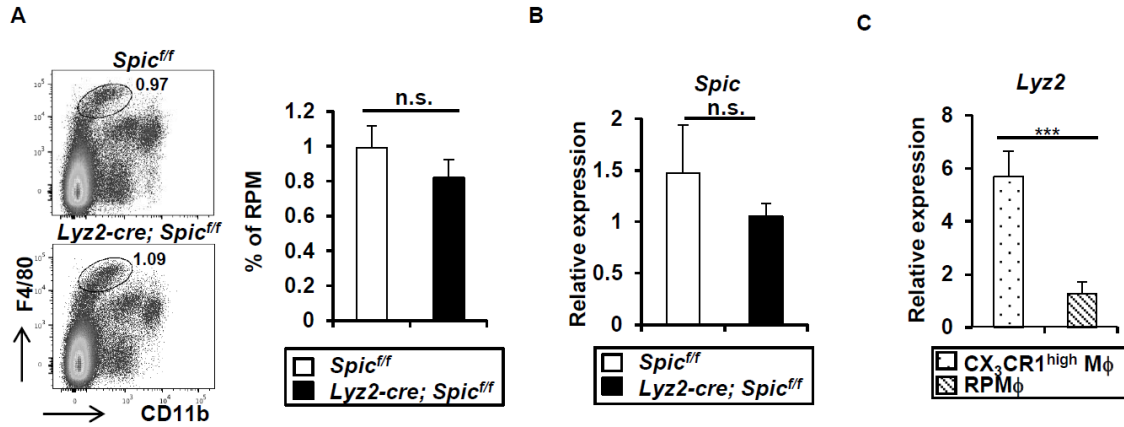

**Fig. S3: RPMφs are present normally in the spleen of *Lyz2-cre; Spic<sup>flox/flox</sup>* mice.**

(A) Flow cytometry analysis of cells from the spleens of control (n = 6) and *Spic* mutant (n = 4) mice (left). Frequencies of CD11b<sup>-</sup> F4/80<sup>high</sup> RPMφs in the spleens (right). All graphs show the means ± SD. n.s., not significant. All data are of four independent experiments. (B) Expression of *Spic* in RPMφs from control and *Spic* mutant mice (means values ± SEM from four independent experiments). (C) Expression of *Lyz2* in RPMφs and intestinal CX<sub>3</sub>CR1<sup>high</sup> Mφs. \*\*\**p* < 0.005. Graphs show the means ± SEM from four independent experiments.

**Figure S4**

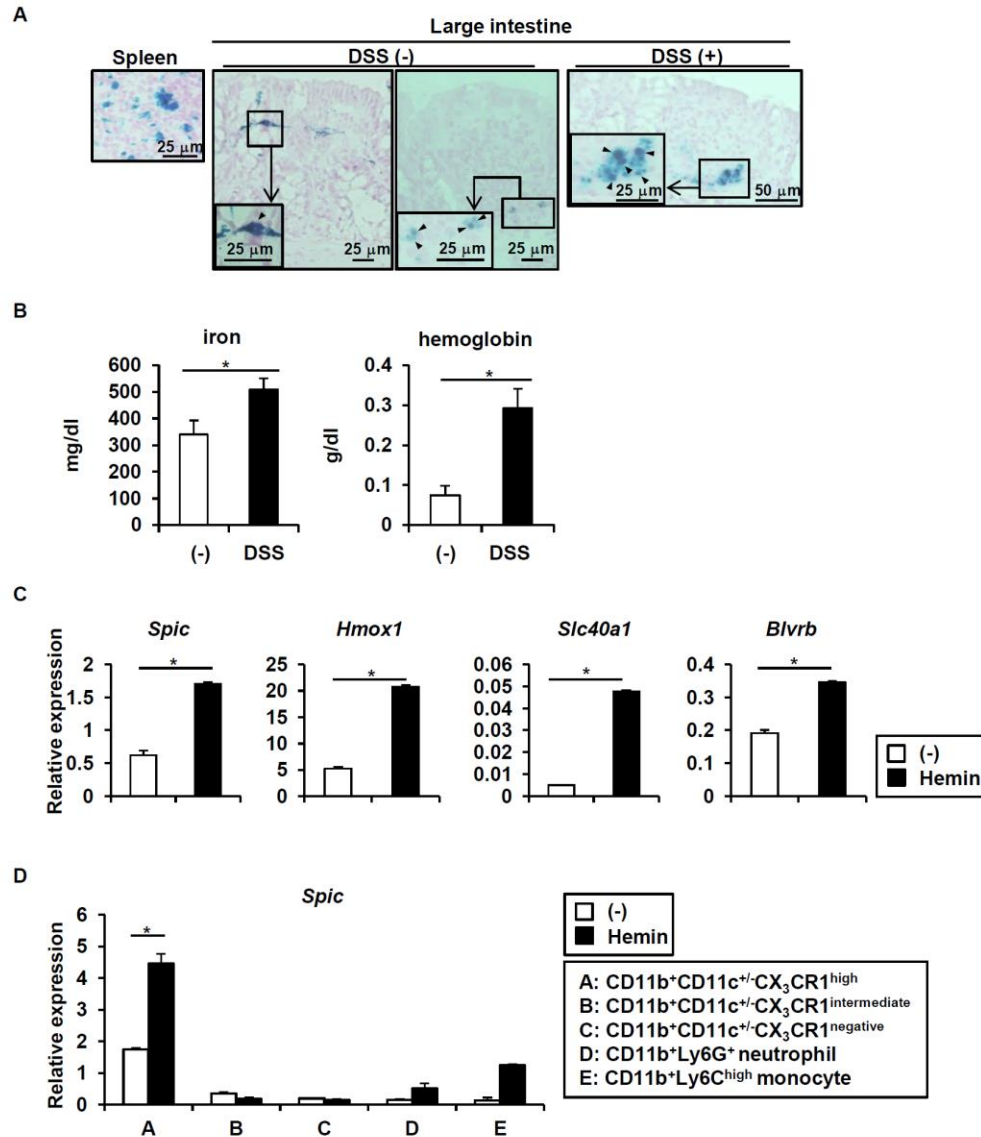

**Fig. S4: The presence of heme in the colon and heme-mediated induction of *Spic* in innate myeloid cells.** (A) Ferric iron of the spleen and colon from C57BL/6J mice administered with or without 1.5% DSS for 5 days were detected with the prussian blue reaction. Arrowheads indicate ferric iron. Insert at the lower left-hand corner of each panel is an engaged image of the boxed area. Data are representative of three independent experiments. (B) Concentration of iron and hemoglobin in large intestinal luminal contents from mice administered with (n = 6) or without DSS (n = 11) (means  $\pm$  SEM). Data are of three independent experiments. \*  $p < 0.05$ . (C, D) C57BL/6J mice were intraperitoneally injected with 1 mg hemin. After 2 days, CD11b<sup>+</sup> CD11c<sup>+</sup> cells (C) and the indicated cell subsets (D) were isolated from the colon and analyzed for the expression of the indicated genes. Graphs show the mean  $\pm$  SEM of three independent experiments. \*  $p < 0.05$ .

Figure S5

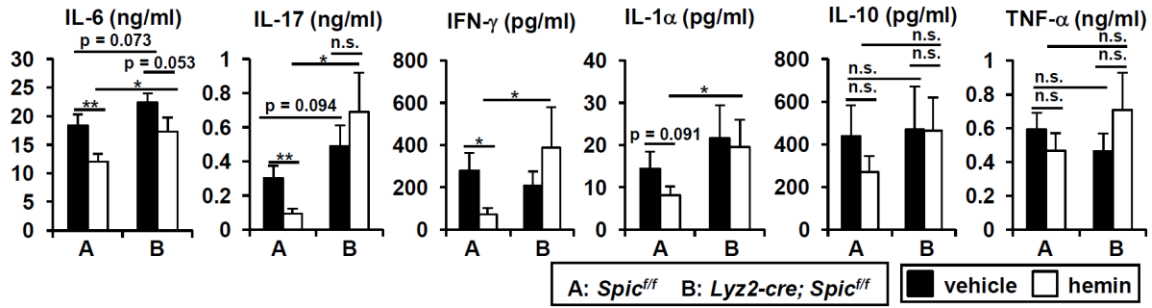

Fig. S5: Effect of hemin on cytokines production in the colon of *Spic<sup>flox/flox</sup>* and *Lyz2-cre; Spic<sup>flox/flox</sup>* mice administered with DSS. Cytokine production from colon explants after DSS administration. \*  $p < 0.05$ , \*\*  $p < 0.01$ . All graphs show the mean  $\pm$  SEM from two separate experiments. n.s., not significant.



**Figure S6**

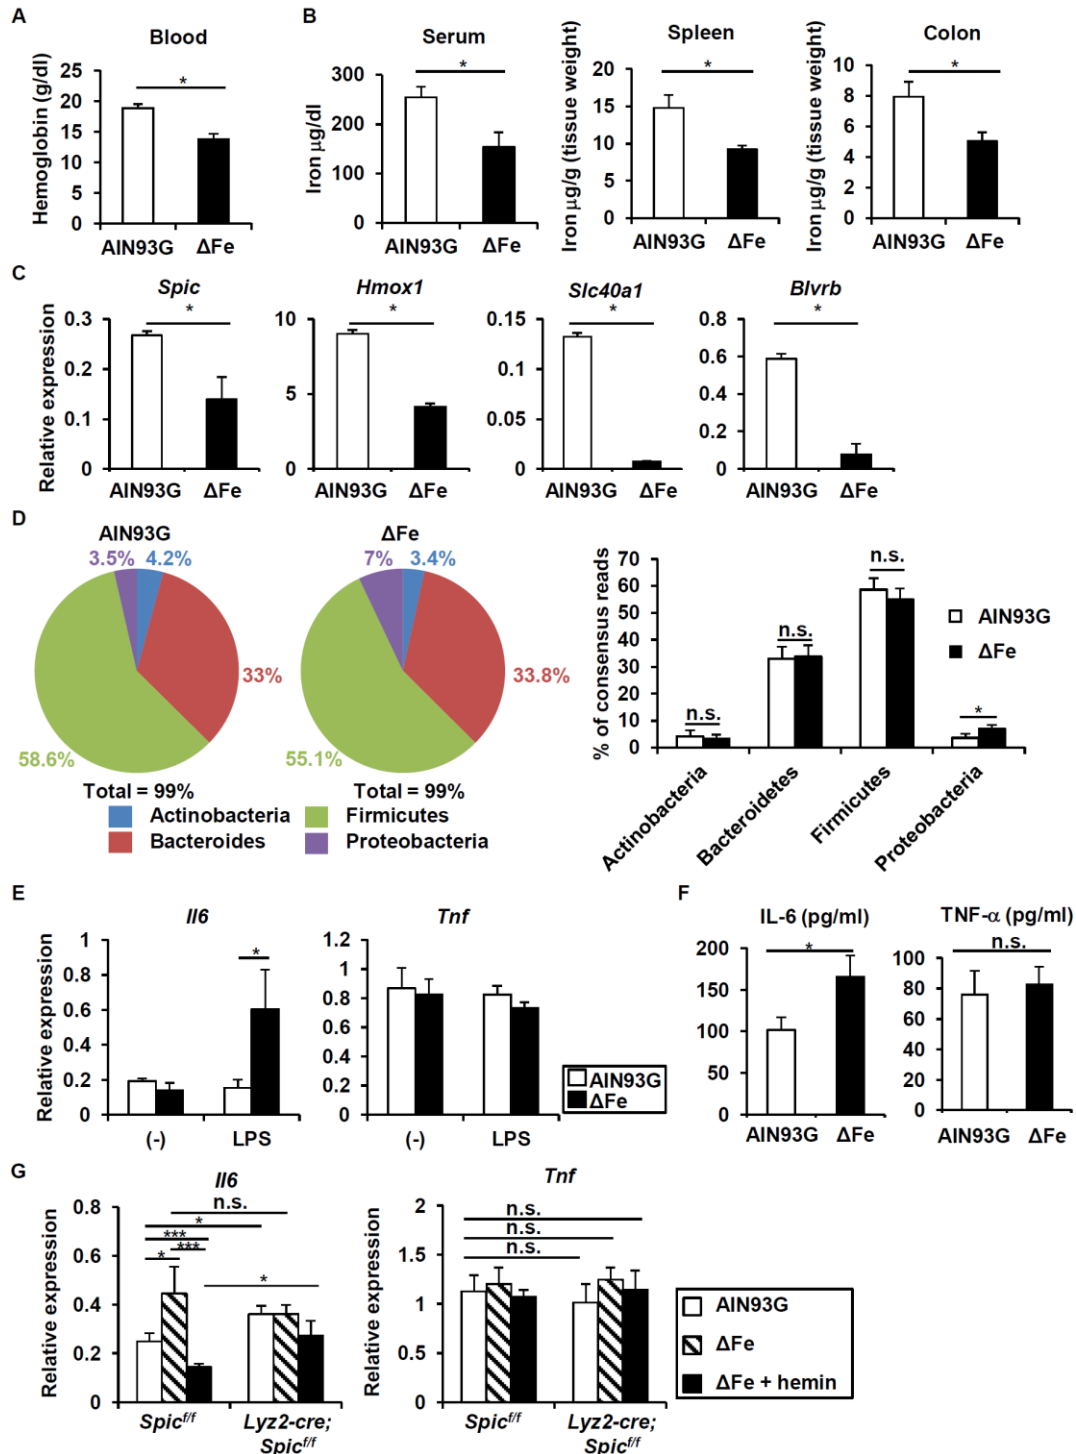

**Fig. S6: Dietary iron suppresses LPS-induced *Il6* expression in large intestinal  $CX_3CR1^{high}$  M $\phi$ s via Spi-C induction.** Four or five-week-old C57BL/6J mice were fed an AIN93G or iron-reduced ( $\Delta Fe$ ) diet for 6 or 7 weeks. (**A**, **B**) Concentration of hemoglobin in the blood (**A**) and iron in the serum, spleens, and colons (**B**) from mice fed the AIN93G (n = 6) or  $\Delta Fe$  diet (n = 9) (mean  $\pm$  SEM). \*  $p < 0.05$ . All data are generated from three independent experiments. (**C**) Expression of the indicated genes in colonic  $CX_3CR1^{high}$  M $\phi$ s from mice fed the AIN93G or  $\Delta Fe$  diet. Mean values  $\pm$  SEM from

two separate experiments are shown (n = 4-5 per group). \*  $p < 0.05$ . **(D)** The mean abundance of the listed commensal phyla, which were determined by DNA sequencing of *16S* ribosomal DNA, in feces of C57BL/6J mice fed the AIN93G (n = 10) and  $\Delta$ Fe diet (n = 12) for 6 weeks (mean values  $\pm$  SD). \*  $p < 0.05$ . n.s., not significant. **(E)** Expression of *Il6* and *Tnf* in colonic CX<sub>3</sub>CR1<sup>high</sup> M $\phi$ s stimulated with or without LPS for 3 h. Mean values  $\pm$  SEM are shown (n = 5 per group). \*  $p < 0.05$ . **(F)** LPS-induced production of IL-6 and TNF- $\alpha$  by colonic CX<sub>3</sub>CR1<sup>high</sup> M $\phi$ s from mice fed the AIN93G or  $\Delta$ Fe diet (n = 14 per group). All graphs show the mean  $\pm$  SEM from three independent experiments. n.s., not significant. \*  $p < 0.05$ . **(G)** Expression of *Il6* and *Tnf* in response to LPS in CX<sub>3</sub>CR1<sup>high</sup> M $\phi$ s from mice fed with the AIN93G (n = 6) and  $\Delta$ Fe diet (n = 6) for 6 weeks. Hemin were injected into  $\Delta$ Fe diet-fed mice every other day during the last 2 weeks (n = 6). \*  $p < 0.05$ , \*\*\*  $p < 0.005$ . n.s., not significant. Graphs show the mean  $\pm$  SEM. All data are of two independent experiments.

Figure S7

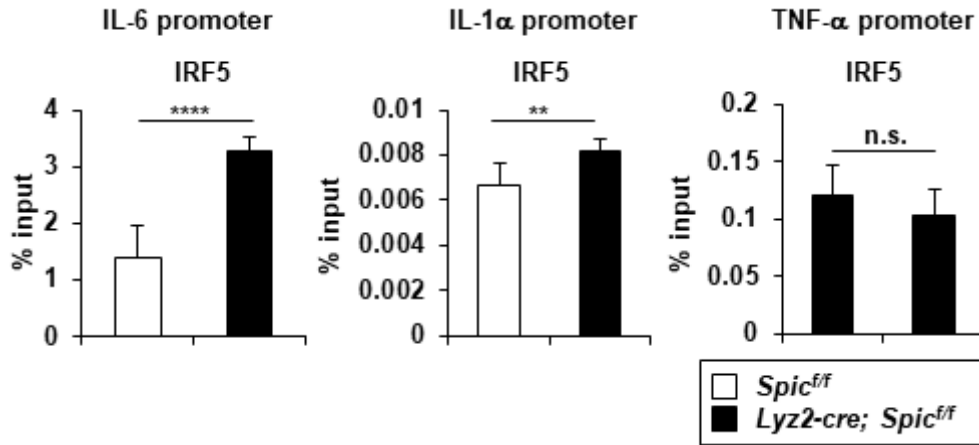

**Fig. S7: Lack of Spi-C leads to increased recruitment of IRF5 to the promoter of *Il1a* and *Il6* in intestinal CX<sub>3</sub>CR1<sup>high</sup> M $\phi$ s.** ChIP assay for the *Il6*, *Il1a*, and *Tnf* promoters of NF- $\kappa$ B-binding site in CX<sub>3</sub>CR1<sup>high</sup> M $\phi$ s from control and *Spic* mutant mice administered with 1.5% DSS for 7 days was performed using anti-IRF5 antibody (the mean  $\pm$  SD). Data are representative of two independent experiments. \*\*  $p < 0.01$ , \*\*\*\*  $p < 0.001$ . n.s, not significant.

**Table S1: Gene expression profiles in large intestinal CX3CR1<sup>high</sup> Mφs.**

| Probe Set ID | Representative Public ID | Gene Symbol         |
|--------------|--------------------------|---------------------|
| 1436213_a_at | AV023018                 | 1110028C15Rik       |
| 1418871_a_at | NM_025308                | 1810007E14Rik       |
| 1451441_at   | BC026828                 | 2210415F13Rik       |
| 1417779_at   | NM_025636                | 2310079N02Rik       |
| 1420113_s_at | AA409325                 | 2410022L05Rik       |
| 1435639_at   | BF580962                 | 2610528A11Rik       |
| 1416607_at   | AI461712                 | 4931406C07Rik       |
| 1452716_at   | AK017688                 | 5730469M10Rik       |
| 1429723_at   | AK018153                 | 6330409N04Rik       |
| 1418100_at   | AK002962                 | A030009H04Rik       |
| 1419572_a_at | NM_008992                | Abcd4               |
| 1422906_at   | NM_011920                | Abcg2               |
| 1453367_a_at | BB178770                 | Abhd12              |
| 1417669_at   | NM_024465                | Abhd12              |
| 1448894_at   | NM_008012                | Akr1b8              |
| 1450455_s_at | AF177041                 | Akr1c12 /// Akr1c13 |
| 1434987_at   | AI462635                 | Aldh2               |
| 1460167_at   | BC012407                 | Aldh7a1             |
| 1419114_at   | AA198774                 | Alg14               |
| 1422573_at   | D85596                   | Ampd3               |
| 1460330_at   | AW702161                 | Anxa3               |
| 1426743_at   | BC002232                 | Appl2               |
| 1452304_a_at | BC025127                 | Arhgef5             |
| 1416735_at   | NM_019734                | Asah1               |
| 1439036_a_at | AV152334                 | Atp1b1              |
| 1423890_x_at | BC027319                 | Atp1b1              |
| 1450634_at   | NM_007508                | Atp6v1a             |
| 1416952_at   | NM_023721                | Atp6v1d             |
| 1449711_at   | C85064                   | Atp6v1e1            |
| 1418736_at   | BC003835                 | B3galnt1            |
| 1425108_a_at | BC004728                 | BC004728            |
| 1415936_at   | NM_013867                | Bcar3               |
| 1451386_at   | BC027279                 | Blvrb               |
| 1417381_at   | NM_007572                | C1qa                |
| 1449401_at   | NM_007574                | C1qc                |
| 1419482_at   | NM_009779                | C3ar1               |
| 1419483_at   | NM_009779                | C3ar1               |
| 1424713_at   | AY061807                 | Calml4              |
| 1416193_at   | BC011223                 | Car1                |
| 1448949_at   | NM_007607                | Car4                |
| 1460196_at   | NM_007620                | Cbr1                |
| 1420380_at   | AF065933                 | Ccl2                |
| 1419561_at   | NM_011337                | Ccl3                |
| 1421578_at   | AF128218                 | Ccl4                |
| 1421228_at   | AF128193                 | Ccl7                |
| 1419684_at   | NM_021443                | Ccl8                |
| 1427736_a_at | AJ318863                 | Ccr12               |
| 1419768_at   | AF102134                 | Cd22                |
| 1450884_at   | BB534670                 | Cd36                |
| 1450136_at   | NM_007646                | Cd38                |
| 1433741_at   | BB256012                 | Cd38                |
| 1450494_x_at | NM_011926                | Ceacam1             |

|              |           |                      |
|--------------|-----------|----------------------|
| 1423693_at   | BC011218  | cela1                |
| 1423153_x_at | AI987976  | Cfh /// LOC100048018 |
| 1450876_at   | AI987976  | Cfh /// LOC100048018 |
| 1424529_s_at | BC023116  | Cgref1               |
| 1436990_s_at | AA038464  | Chchd10              |
| 1449402_at   | AB046929  | Chst7                |
| 1432418_a_at | AK018487  | Ckmt1                |
| 1417089_a_at | NM_009897 | Ckmt1                |
| 1448161_a_at | NM_011334 | Clcn4-2              |
| 1415986_at   | NM_011334 | Clcn4-2              |
| 1460569_x_at | AW611462  | Cldn3                |
| 1424673_at   | AF350410  | Clec2h               |
| 1425951_a_at | AF240358  | Clec4n               |
| 1419627_s_at | NM_020001 | Clec4n               |
| 1449183_at   | NM_007744 | Comt1                |
| 1418709_at   | AF037370  | Cox7a1               |
| 1448734_at   | BB332449  | Cp                   |
| 1417496_at   | BB332449  | Cp                   |
| 1417495_x_at | BB332449  | Cp                   |
| 1420617_at   | NM_026252 | Cpeb4                |
| 1416795_at   | NM_030004 | Cry11                |
| 1448732_at   | M14222    | Ctsb                 |
| 1417492_at   | M14222    | Ctsb                 |
| 1451310_a_at | J02583    | Ctsl                 |
| 1450020_at   | BC012653  | Cx3cr1               |
| 1419582_at   | NM_028089 | Cyp2c55              |
| 1423805_at   | BC006588  | Dab2                 |
| 1420498_a_at | NM_023118 | Dab2                 |
| 1430604_a_at | AW986632  | Dab2                 |
| 1452070_at   | AK010701  | Dedd2                |
| 1418287_a_at | NM_007769 | Dmbt1                |
| 1418591_at   | NM_021422 | Dnaja4               |
| 1435680_a_at | BG067113  | Dpp7                 |
| 1439476_at   | BG092030  | Dsg2                 |
| 1435493_at   | AV297961  | Dsp                  |
| 1426314_at   | BB770914  | Ednrb                |
| 1423594_a_at | BB451714  | Ednrb                |
| 1426607_at   | BG068672  | EG633640             |
| 1451161_a_at | U66888    | Emr1                 |
| 1419062_at   | NM_013813 | Epb4.113             |
| 1448798_at   | NM_133867 | Eps8l3               |
| 1450684_at   | NM_007960 | Etv1                 |
| 1423680_at   | BC026831  | Fads1                |
| 1417953_at   | AK016470  | Fam3c                |
| 1455332_x_at | BM224327  | Fcgr2b               |
| 1451941_a_at | M14216    | Fcgr2b               |
| 1435476_a_at | BM224327  | Fcgr2b               |
| 1425225_at   | BC027310  | Fcgr4                |
| 1416978_at   | NM_010189 | Fcgrt                |
| 1448891_at   | BC016551  | Fcrls                |
| 1419378_a_at | NM_052823 | Fxyd2                |
| 1418207_at   | NM_033648 | Fxyd4                |
| 1452907_at   | AK010101  | Galc                 |
| 1417399_at   | NM_019521 | Gas6                 |
| 1418444_a_at | BC003902  | Gde1                 |
| 1418949_at   | NM_011819 | Gdf15                |

|              |           |                   |
|--------------|-----------|-------------------|
| 1424077_at   | AK016023  | Gdpd1             |
| 1417178_at   | NM_016867 | Gipc2             |
| 1426235_a_at | AI391218  | Glul              |
| 1448303_at   | NM_053110 | Gpnmb             |
| 1422542_at   | NM_011823 | Gpr34             |
| 1455007_s_at | BI648645  | Gpt2              |
| 1438385_s_at | BB068040  | Gpt2              |
| 1416905_at   | NM_008190 | Guca2a            |
| 1418350_at   | L07264    | Hbegf             |
| 1450868_at   | BF468249  | Hgsnat            |
| 1416481_s_at | NM_019814 | Higd1a            |
| 1424755_at   | BB320674  | Hip1              |
| 1448239_at   | NM_010442 | Hmox1             |
| 1419905_s_at | AV026552  | Hpgd              |
| 1419821_s_at | AI788952  | Idh1              |
| 1418293_at   | NM_008332 | Ifit2             |
| 1422305_at   | NM_010510 | Ifnb1             |
| 1437401_at   | BG075165  | Igf1              |
| 1419519_at   | NM_010512 | Igf1              |
| 1450330_at   | NM_010548 | Il10              |
| 1423017_a_at | NM_031167 | Il1rn             |
| 1415911_at   | NM_008378 | Impact            |
| 1450029_s_at | NM_133721 | Itga9             |
| 1423994_at   | BQ175246  | Kif1b             |
| 1451200_at   | BQ175246  | Kif1b             |
| 1415855_at   | BB815530  | Kitl              |
| 1415837_at   | BC010754  | Klk1              |
| 1448107_x_at | BC010754  | Klk1              |
| 1426284_at   | AF473907  | Krt20             |
| 1423691_x_at | M21836    | Krt8              |
| 1435989_x_at | AW322280  | Krt8              |
| 1420647_a_at | NM_031170 | Krt8              |
| 1425141_at   | BE691552  | Lactb2            |
| 1451336_at   | BC021632  | Lgals4            |
| 1424594_at   | BC011507  | Lgals7            |
| 1455056_at   | BM231903  | Lmo7              |
| 1428394_at   | AK005293  | Lrrc8a /// Phyhd1 |
| 1419692_a_at | NM_008521 | Ltc4s             |
| 1429379_at   | AV124537  | Lyve1             |
| 1428667_at   | AW986246  | Maoa              |
| 1426244_at   | BC027056  | Mapre2            |
| 1431705_a_at | AK014467  | Mcoln2            |
| 1422869_at   | NM_008587 | Mertk             |
| 1452592_at   | AV066880  | Mgst2             |
| 1450430_at   | NM_008625 | Mrc1              |
| 1419598_at   | NM_026835 | Ms4a6d            |
| 1424754_at   | BC024402  | Ms4a7             |
| 1452288_at   | BG071933  | Mtmr10            |
| 1424826_s_at | BC024131  | Mtss1             |
| 1419754_at   | NM_010864 | Myo5a             |
| 1423516_a_at | BB781435  | Nid2              |
| 1423086_at   | BB769209  | Npc1              |
| 1424265_at   | BC022734  | Npl               |
| 1448943_at   | AK011144  | Nrp1              |
| 1424339_at   | AB067533  | Oasl1             |
| 1431724_a_at | AK013804  | P2ry12            |

|              |           |           |
|--------------|-----------|-----------|
| 1424453_at   | BC018313  | Pcyt1a    |
| 1418711_at   | BB371842  | Pdgfa     |
| 1449187_at   | BB371842  | Pdgfa     |
| 1450413_at   | BC023427  | Pdgfb     |
| 1449351_s_at | NM_019971 | Pdgfc     |
| 1448995_at   | NM_019932 | Pf4       |
| 1422139_at   | NM_008873 | Plau      |
| 1417133_at   | NM_008885 | Pmp22     |
| 1418480_at   | NM_023785 | Ppbp      |
| 1420611_at   | AV024339  | Prkacb    |
| 1421492_at   | NM_019455 | Ptgs2     |
| 1436448_a_at | AA833146  | Ptgs1     |
| 1425863_a_at | AF295638  | Ptpro     |
| 1427405_s_at | BF682225  | Rab11fip5 |
| 1421430_at   | NM_009014 | Rad51l1   |
| 1427412_s_at | BQ177183  | Rapgef6   |
| 1416390_at   | NM_134083 | Rcbtb2    |
| 1416389_a_at | NM_134083 | Rcbtb2    |
| 1449124_at   | NM_016846 | Rgl1      |
| 1434628_a_at | BF228009  | Rhpn2     |
| 1431805_a_at | AK004849  | Rhpn2     |
| 1451074_at   | AF037205  | Rnf13     |
| 1415749_a_at | NM_017475 | Rragc     |
| 1421008_at   | BB741897  | Rsad2     |
| 1450788_at   | NM_009117 | Saa1      |
| 1419075_s_at | NM_011314 | Saa1      |
| 1448005_at   | BI658899  | Sash1     |
| 1456080_a_at | BM239368  | Serinc3   |
| 1448847_at   | NM_012032 | Serinc3   |
| 1450138_a_at | NM_009254 | Serpinb6a |
| 1422894_at   | AV214764  | Sfmbt1    |
| 1415893_at   | NM_009163 | Sgpl1     |
| 1417584_at   | BF019859  | Slc11a2   |
| 1418257_at   | BB732135  | Slc12a7   |
| 1428114_at   | AW556396  | Slc14a1   |
| 1452492_a_at | BC022752  | Slc37a2   |
| 1417061_at   | AF226613  | Slc40a1   |
| 1417116_at   | BG069516  | Slc6a8    |
| 1449134_s_at | NM_011461 | Spic      |
| 1450618_a_at | NM_011468 | Spr2a     |
| 1439016_x_at | AV371678  | Spr2a     |
| 1425351_at   | BC011325  | Srxn1     |
| 1449078_at   | NM_018784 | St3gal6   |
| 1450199_a_at | NM_138672 | Stab1     |
| 1427072_at   | BM119481  | Stard8    |
| 1434803_a_at | AV050299  | Sycn      |
| 1460287_at   | M93954    | Timp2     |
| 1452161_at   | BB707122  | Tiparp    |
| 1425025_at   | BC022145  | Tmem106a  |
| 1424354_at   | BC020080  | Tmem140   |
| 1448552_s_at | NM_025864 | Tmem206   |
| 1424357_at   | BC026654  | Tmem45b   |
| 1424782_at   | BC024458  | Tmem77    |
| 1434768_at   | AI266910  | Tpp1      |
| 1448313_at   | NM_009906 | Tpp1      |
| 1425546_a_at | AF440692  | Trf       |

|              |           |         |
|--------------|-----------|---------|
| 1424649_a_at | BC025461  | Tspan8  |
| 1434500_at   | BF585303  | Ttyh2   |
| 1416689_at   | NM_011656 | Tuft1   |
| 1436890_at   | BG963358  | Uap111  |
| 1417847_at   | NM_013881 | Ulk2    |
| 1415989_at   | BB250384  | Vcam1   |
| 1448162_at   | BB250384  | Vcam1   |
| 1451803_a_at | U48800    | Vegfb   |
| 1452299_at   | BI102531  | Wwp1    |
| 1427098_at   | BI102531  | Wwp1    |
| 1424602_s_at | BC025538  | Xrcc4   |
| 1438975_x_at | AV361868  | Zdhhc14 |
| 1423668_at   | BC021423  | Zdhhc14 |
| 1437614_x_at | AV223474  | Zdhhc14 |
| 1438619_x_at | BB318221  | Zdhhc14 |
| 1451518_at   | BC021921  | Zfp709  |

---



**Table S2: Spi-C-dependent LPS-inducible genes in BMDMφs pretreated with hemin.**

| <b>Symbol</b> | <b>Description</b>                                                                 |
|---------------|------------------------------------------------------------------------------------|
| 1190003J15Rik | RIKEN cDNA 1190003J15 gene                                                         |
| 2200002D01Rik | RIKEN cDNA 2200002D01 gene                                                         |
| 4833427G06Rik | RIKEN cDNA 4833427G06 gene                                                         |
| 6530402F18Rik | RIKEN cDNA 6530402F18 gene                                                         |
| 9130014G24Rik | RIKEN cDNA 9130014G24 gene                                                         |
| A130049A11Rik | RIKEN cDNA A130049A11 gene                                                         |
| A630012P03Rik | RIKEN cDNA A630012P03 gene                                                         |
| AA467197      | expressed sequence AA467197                                                        |
| Acpp          | acid phosphatase, prostate                                                         |
| Adhfe1        | alcohol dehydrogenase, iron containing, 1                                          |
| Apo19a        | apolipoprotein L 9a                                                                |
| Apo19b        | apolipoprotein L 9b                                                                |
| AV051173      | expressed sequence AV051173                                                        |
| BC147527      | cDNA sequence BC147527                                                             |
| Bend6         | BEN domain containing 6                                                            |
| Fndc9         | fibronectin type III domain containing 9                                           |
| Car15         | carbonic anhydrase 15                                                              |
| Cd38          | CD38 antigen                                                                       |
| Ch25h         | cholesterol 25-hydroxylase                                                         |
| Cish          | cytokine inducible SH2-containing protein                                          |
| Cited2        | Cbp/p300-interacting transactivator, with Glu/Asp-rich carboxy-terminal domain, 2  |
| Clec4a4       | C-type lectin domain family 4, member a4                                           |
| Clic5         | chloride intracellular channel 5                                                   |
| Cmpk2         | cytidine monophosphate (UMP-CMP) kinase 2, mitochondrial                           |
| Cxcl11        | chemokine (C-X-C motif) ligand 11                                                  |
| Dpep3         | dipeptidase 3                                                                      |
| Dusp14        | dual specificity phosphatase 14                                                    |
| F3            | coagulation factor III                                                             |
| Fam132b       | family with sequence similarity 132, member B                                      |
| Fam189a2      | family with sequence similarity 189, member A2                                     |
| Fam3b         | family with sequence similarity 3, member B                                        |
| Galnt3        | UDP-N-acetyl-alpha-D-galactosamine:polypeptide N-acetylgalactosaminyltransferase 3 |
| Gbp4          | guanylate binding protein 4                                                        |
| Gdf15         | growth differentiation factor 15                                                   |
| Gm10865       | predicted gene 10865                                                               |
| Gm12185       | predicted gene 12185                                                               |
| Gm14446       | predicted gene 14446                                                               |
| Gm3086        | RuvB-like protein 1 pseudogene                                                     |
| Gm4759        | GTPase, very large interferon inducible 1 pseudogene                               |
| Gm4902        | predicted gene 4902                                                                |
| Gm527         | predicted gene 527                                                                 |
| Gm5431        | predicted gene 5431                                                                |
| H2-M2         | histocompatibility 2, M region locus 2                                             |
| Hap1          | huntingtin-associated protein 1                                                    |
| Hilpda        | hypoxia inducible lipid droplet associated                                         |

|         |                                                                                 |
|---------|---------------------------------------------------------------------------------|
| Ifit2   | interferon-induced protein with tetratricopeptide repeats 2                     |
| Ifnb1   | interferon beta 1, fibroblast                                                   |
| Igsf9   | immunoglobulin superfamily, member 9                                            |
| Il1a    | interleukin 1 alpha                                                             |
| Il6     | interleukin 6                                                                   |
| Inhba   | inhibin beta-A                                                                  |
| Isg20   | interferon-stimulated protein                                                   |
| Lpcat2  | lysophosphatidylcholine acyltransferase 2                                       |
| Ltf     | lactotransferrin                                                                |
| Mmp25   | matrix metalloproteinase 25                                                     |
| Ms4a4b  | membrane-spanning 4-domains, subfamily A, member 4B                             |
| Ms4a4c  | membrane-spanning 4-domains, subfamily A, member 4C                             |
| Myc11   | v-myc myelocytomatosis viral oncogene homolog 1, lung carcinoma derived (avian) |
| Niacr1  | niacin receptor 1                                                               |
| Nlrc5   | NLR family, CARD domain containing 5                                            |
| Ntn2    | netrin G2                                                                       |
| Ocstamp | osteoclast stimulatory transmembrane protein                                    |
| Olf110  | olfactory receptor 110                                                          |
| Olf56   | olfactory receptor 56                                                           |
| Osm     | oncostatin M                                                                    |
| Pcgf5   | polycomb group ring finger 5                                                    |
| Pgf     | placental growth factor                                                         |
| Phf11   | PHD finger protein 11                                                           |
| Pnp2    | purine-nucleoside phosphorylase 2                                               |
| Rab38   | RAB38, member of RAS oncogene family                                            |
| Rhof    | ras homolog gene family, member f                                               |
| Rsad2   | radical S-adenosyl methionine domain containing 2                               |
| Schip1  | schwannomin interacting protein 1                                               |
| Siglece | sialic acid binding Ig-like lectin E                                            |
| Slfn1   | schlafen 1                                                                      |
| Slfn4   | schlafen 4                                                                      |
| Slfn9   | schlafen 9                                                                      |
| Sncg    | synuclein, gamma                                                                |
| Tlr1    | toll-like receptor 1                                                            |
| Tnfsf10 | tumor necrosis factor (ligand) superfamily, member 10                           |
| Tpbp    | trophoblast glycoprotein                                                        |
| Trem1   | triggering receptor expressed on myeloid cells 1                                |
| Txlnb   | taxilin beta                                                                    |
| Upp1    | uridine phosphorylase 1                                                         |
| Zbtb32  | zinc finger and BTB domain containing 32                                        |

## References

1. Kanki H, Suzuki H, & Itohara S (2006) High-efficiency CAG-FLPe deleter mice in C57BL/6J background. *Experimental animals* 55(2):137-141.
2. Atarashi K, *et al.* (2008) ATP drives lamina propria T(H)17 cell differentiation. *Nature* 455(7214):808-812.
3. Van der Sluis M, *et al.* (2006) Muc2-deficient mice spontaneously develop colitis, indicating that MUC2 is critical for colonic protection. *Gastroenterology* 131(1):117-129.
4. Sato A, *et al.* (2015) The Wnt5a-Ror2 axis promotes the signaling circuit between interleukin-12 and interferon-gamma in colitis. *Scientific reports* 5:10536.
5. Okumura R, *et al.* (2016) Lypd8 promotes the segregation of flagellated microbiota and colonic epithelia. *Nature* 532(7597):117-121.
